# Supplementary material for: Regeneration of the larval sea star nervous system by wounding induced respecification to the Sox2 lineage
Source: eLife. 2022 Jan 14;11:e72983. doi: 10.7554/eLife.72983 (PMC8809897; doi:10.7554/eLife.72983)
Supplement: Figure 3—source data 1. [file elife-72983-fig3-data1.xlsx]

## Sheet: color determination
Quantification of Kaede color and protein stability
	red	yeallow	green
ratio of 560nm/488nm	>5	0.2-5	<0.2
ratio	Sox4+ cells at the regeneration leading edge			log of FI
green	FI of green (488nm)	FI of red (560nm)		green (488nm)	red (560nm)
0.17323	50.609	8.767		1.70423	0.942851
0.167923	202.027	33.925		2.30541	1.53052
0.102619	48.607	4.988		1.6867	0.697926
0.110523	606.68	67.052		2.78296	1.82641
0.0947033	605.512	57.344		2.78212	1.75849
0.141505	198.911	28.147		2.29866	1.44943
0.0819039	874.525	71.627		2.94177	1.85508
0.182466	476.714	86.984		2.67826	1.93944
0.126289	195.108	24.64		2.29028	1.39164
0.148332	47.724	7.079		1.67874	0.849972
0.140824	126.47	17.81		2.10199	1.25066
red
31.4592	6.193	194.827		0.791901	2.28965
15.7153	6.333	99.525		0.801609	1.99793
7.06216	13.08	92.373		1.11661	1.96555
7.89227	18.463	145.715		1.2663	2.1635
7.91694	31.279	247.634		1.49525	2.39381
5.02314	15.687	78.798		1.19554	1.89652
6.11013	17.751	108.461		1.24922	2.03527
8.33375	48.317	402.662		1.6841	2.60494
26.7948	20.697	554.573		1.31591	2.74396
8.15213	40.4	329.346		1.60638	2.51765
6.25852	31.561	197.525		1.49915	2.29562
14.6859	11.603	170.4		1.06457	2.23147
13.687	21.342	292.108		1.32924	2.46554
20.3935	59.655	1216.58		1.77565	3.08514
9.11039	53.065	483.443		1.72481	2.68435
18.3706	7.42	136.31		0.870404	2.13453
yellow
1.16876	76.551	89.47		1.88395	1.95168
4.57226	53.514	244.68		1.72847	2.3886
0.491516	99.718	49.013		1.99877	1.69031
0.523378	160.473	83.988		2.2054	1.92422
0.509957	47.053	23.995		1.67259	1.38012
0.306582	656.75	201.348		2.8174	2.30395
0.457438	802.668	367.171		2.90454	2.56487
3.17741	548.157	1741.72		2.7389	3.24098
1.19152	118.145	140.772		2.07242	2.14852
0.739367	42.462	31.395		1.628	1.49686
0.290704	122.021	35.472		2.08643	1.54989

## Sheet: Kaede conversion
time (s)	488 nm net FI	560 nm net FI	FI 560 nm/ FI 488 nm
0	2070.12	23.151	0.0111834
10	1694.08	175.767	0.103753
20	1377.78	342.504	0.24859
30	1138.89	504.328	0.442822
40	946.542	650.083	0.686798
50	808.612	793.948	0.981865
60	704.282	939.34	1.33376
70	602.928	1059.63	1.75748
80	525.682	1165.46	2.21705
90	455.634	1270.07	2.78747
100	407.539	1367.72	3.35605
110	359.587	1457.39	4.05295
120	324.27	1543.31	4.75934
130	289.416	1611	5.56639
140	263.865	1687.55	6.39551
150	239.658	1762.92	7.35598
160	219.922	1815.17	8.25368

## Sheet: mKaede protein decay 
kaede mRNA injection followed by daily observation of fluorescent intensity of Kaede protein in the same larva over time
														day	1	2	3	4	5	6	7	8	9	10	11	12	13	14	15
														avg 488 nm	269.4	788.9	518.9	470.3	467	490.1	311.2	310	274.7	281.3	218.8	210.9	191.5	159.6	164.5
batch2 embryo 3														avg 560 nm	337	399.5	278.6	257	259.4	273.2	197.7	198.4	181.7	186.7	163.4	159.9	153.3	137.5	140.1
	26hpf	green					red
		area	mean	mini	maxi		area	mean	mini	maxi
	1	403.911	209.951	98	795		2	403.911	256.03	98	1017
	3	403.911	219.259	98	887		4	403.911	270.003	97	1086
	5	403.911	229.932	95	947		6	403.911	283.625	98	1095
	7	403.911	240.438	95	906		8	403.911	297.916	98	1086
	9	403.911	251.316	98	1037		10	403.911	313.01	99	1173
	11	403.911	262.843	97	1111		12	403.911	329.75	99	1111
	13	403.911	273.504	99	1068		14	403.911	346.484	98	1187
	15	403.911	286.055	100	1075		16	403.911	361.042	100	1244
	17	403.911	296.184	97	1103		18	403.911	376.386	100	1257
	19	403.911	307.862	96	1013		20	403.911	389.578	98	1442
	21	403.911	321.686	98	1134		22	403.911	403.17	98	1385
	23	403.911	334.137	100	1268		24	403.911	417.473	98	1530
	avg		269.431				avg		337.039
	unit area		0.667054				unit area		0.834439
	avg (top bottom 3 slices off)		268.39						337.431
	48hpf	green					red
	1	327.131	483.817	100	1759		2	327.131	286.652	99	956
	3	327.131	533.314	100	1866		4	327.131	308.672	100	1115
	5	327.131	593.939	100	2390		6	327.131	335.162	98	1239
	7	327.131	664.479	98	2540		8	327.131	362.38	100	1334
	9	327.131	735.987	100	3289		10	327.131	389.837	100	1367
	11	327.131	809.204	99	3170		12	327.131	416.464	99	1500
	13	327.131	879.106	100	3325		14	327.131	438.528	94	1454
	15	327.131	937.434	101	3024		16	327.131	452.448	96	1468
	17	327.131	980.827	98	3164		18	327.131	464.6	100	1488
	19	327.131	1020.78	103	3122		20	327.131	471.286	100	1423
	21	327.131	1038.75	97	3030		22	327.131	468.534	98	1350
	avg		788.876				avg		399.506
	unit area		2.4115				unit are		1.22124
			805.242						411.931
	74h	green					red
	1	684.231	299.857	98	1232		2	684.231	194.057	100	576
	3	684.231	324.045	98	1320		4	684.231	204.255	100	683
	5	684.231	345.204	99	1632		6	684.231	213.89	98	815
	7	684.231	368.183	97	1739		8	684.231	223.231	98	927
	9	684.231	397.69	99	2171		10	684.231	234.366	99	992
	11	684.231	431.075	99	2291		12	684.231	250.054	98	964
	13	684.231	472.418	99	2241		14	684.231	265.584	98	1119
	15	684.231	508.556	98	2671		16	684.231	278.994	96	1104
	17	684.231	541.378	98	2589		18	684.231	290.945	97	1185
	19	684.231	570.504	97	2784		20	684.231	300.103	99	1171
	21	684.231	600.454	99	2467		22	684.231	308.325	95	1224
	23	684.231	651.751	99	2429		24	684.231	324.849	99	1108
	25	684.231	728.153	99	2408		26	684.231	350.96	100	1155
	27	684.231	787.802	98	2274		28	684.231	373.41	99	1107
	29	684.231	756.211	97	2042		30	684.231	366.072	99	1002
	avg		518.885				avg		278.606
	unit area		0.758348				unit area		0.407182
	96h	green					red
	1	635.06	301.307	99	1121		2	635.06	193.382	96	610
	3	635.06	317.326	99	1711		4	635.06	200.265	97	710
	5	635.06	339.215	98	1902		6	635.06	208.801	97	811
	7	635.06	362.011	98	2126		8	635.06	218.044	95	1076
	9	635.06	391.451	98	2455		10	635.06	229.678	96	1037
	11	635.06	423.317	97	2660		12	635.06	240.592	96	1168
	13	635.06	458.094	99	2887		14	635.06	254.193	97	1200
	15	635.06	489.448	98	2950		16	635.06	266.302	97	1155
	17	635.06	514.56	98	2774		18	635.06	274.436	97	1240
	19	635.06	530.533	98	2581		20	635.06	280.608	96	1242
	21	635.06	543.939	97	2913		22	635.06	285.392	99	1258
	23	635.06	557.092	100	2695		24	635.06	288.31	98	1215
	25	635.06	570.399	100	2594		26	635.06	291.202	99	1151
	27	635.06	579.455	99	2765		28	635.06	294.297	98	1138
	29	635.06	579.264	101	2386		30	635.06	295.679	98	1206
	31	635.06	567.309	100	2358		32	635.06	291.461	97	1342
	avg		470.295				avg		257.04
	unit area		0.740552				unit area		0.404749
	123hpf 5d	green					red
	1	566.541	302.325	92	1524		2	566.541	196.195	91	721
	3	566.541	319.314	93	1447		4	566.541	202.601	90	728
	5	566.541	337.949	92	1619		6	566.541	210.304	87	791
	7	566.541	359.197	93	1913		8	566.541	219.273	90	898
	9	566.541	387.146	93	2008		10	566.541	230.101	90	1058
	11	566.541	420.675	92	2399		12	566.541	243.654	90	1137
	13	566.541	458.572	93	2915		14	566.541	258.788	91	1318
	15	566.541	497.845	92	2661		16	566.541	273.501	91	1373
	17	566.541	531.356	93	2865		18	566.541	285.424	90	1532
	19	566.541	556.633	95	3153		20	566.541	293.357	91	1384
	21	566.541	572.596	89	2732		22	566.541	300.575	94	1304
	23	566.541	576.244	92	2561		24	566.541	301.984	94	1356
	25	566.541	572.353	93	2398		26	566.541	299.371	91	1373
	27	566.541	553.764	88	2411		28	566.541	290.381	94	1455
	29	566.541	526.073	92	2664		30	566.541	278.218	86	1344
	31	566.541	499.435	93	2642		32	566.541	267.035	93	1456
	avg		466.967						259.423
			0.824243						0.457906
	144h 6d	green					red
	1	632.878	291.445	91	1328		2	632.878	193.635	87	795
	3	632.878	312.747	93	1724		4	632.878	203.277	93	842
	5	632.878	336.902	88	1845		6	632.878	213.339	91	1090
	7	632.878	361.596	89	2567		8	632.878	223.816	91	1114
	9	632.878	390.335	89	3058		10	632.878	235.588	91	1553
	11	632.878	426.082	92	3501		12	632.878	247.902	90	1507
	13	632.878	461.195	93	3845		14	632.878	261.651	90	1393
	15	632.878	493.368	89	3083		16	632.878	273.691	89	1604
	17	632.878	521.057	90	3338		18	632.878	284.655	90	1677
	19	632.878	543.005	92	3049		20	632.878	295.583	91	1746
	21	632.878	563.662	91	3760		22	632.878	301.785	89	1557
	23	632.878	581.028	93	3484		24	632.878	307.587	91	1688
	25	632.878	596.059	92	3358		26	632.878	313.753	90	1606
	27	632.878	606.889	86	3525		28	632.878	317.541	93	1756
	29	632.878	619.002	94	3171		30	632.878	320.636	89	1668
	31	632.878	617.569	92	3109		32	632.878	322.985	89	1700
	33	632.878	583.915	92	3045		34	632.878	313.742	90	1599
	35	632.878	517.078	90	2650		36	632.878	286.717	91	1621
	avg		490.163				avg		273.216
			0.774498						0.431704
171h 7d	green						red
	1	660.897	228.966	102	853		2	660.897	165.706	102	504
	3	660.897	239.883	101	912		4	660.897	170.237	101	542
	5	660.897	250.711	102	1072		6	660.897	175.034	102	517
	7	660.897	262.125	101	1295		8	660.897	178.321	100	652
	9	660.897	270.736	101	1348		10	660.897	184.276	102	651
	11	660.897	289.41	101	1657		12	660.897	190.475	100	721
	13	660.897	304.803	102	1782		14	660.897	196.641	101	705
	15	660.897	318.284	101	1638		16	660.897	201.347	102	825
	17	660.897	329.85	101	1699		18	660.897	205.511	102	885
	19	660.897	339.646	101	1610		20	660.897	209.038	101	779
	21	660.897	349.708	99	1715		22	660.897	213.387	100	827
	23	660.897	357.451	101	1687		24	660.897	215.781	101	928
	25	660.897	361.675	101	1663		26	660.897	217.799	101	993
	27	660.897	360.205	102	1727		28	660.897	216.522	101	893
	29	660.897	353.264	101	1757		30	660.897	213.075	100	763
	31	660.897	341.004	100	1667		32	660.897	207.157	101	678
	33	660.897	328.715	100	1544		34	660.897	201.667	100	633
	35	660.897	315.672	101	1185		36	660.897	195.934	101	605
			311.228						197.662
			0.470918						0.299081
193h 8d	g						red
	1	718.23	242.674	102	1042		2	718.23	171.784	101	677
	3	718.23	256.475	105	1262		4	718.23	177.782	101	653
	5	718.23	270.682	102	1539		6	718.23	183.918	101	744
	7	718.23	286.109	102	1616		8	718.23	189.36	101	735
	9	718.23	299.875	103	1627		10	718.23	194.255	102	852
	11	718.23	310.742	102	1773		12	718.23	198.722	101	768
	13	718.23	316.253	102	1733		14	718.23	200.755	101	821
	15	718.23	320.676	103	1698		16	718.23	202.247	102	846
	17	718.23	322.678	103	1833		18	718.23	203.032	102	966
	19	718.23	324.835	101	1835		20	718.23	203.313	101	835
	21	718.23	328.879	100	1696		22	718.23	205.036	102	864
	23	718.23	333.739	101	1587		24	718.23	206.647	101	906
	25	718.23	337.63	100	1653		26	718.23	208.867	100	858
	27	718.23	341.317	100	1806		28	718.23	209.87	102	1026
	29	718.23	338.467	101	1777		30	718.23	209.847	102	956
	31	718.23	330.405	101	1870		32	718.23	207.441	101	1057
	33	718.23	309.346	101	1779		34	718.23	199.77	99	945
	avg		310.046				avg		198.391
	unit area		0.431681				unit area		0.276222
219h 9d	green						red
	1	901.702	215.765	102	857		2	901.702	160.293	102	500
	3	901.702	229.655	101	1040		4	901.702	166.187	101	618
	5	901.702	237.591	102	1048		6	901.702	169.737	99	707
	7	901.702	243.097	101	1112		8	901.702	171.661	102	689
	9	901.702	250.125	101	1294		10	901.702	173.772	101	647
	11	901.702	261.401	102	1289		12	901.702	177.676	102	632
	13	901.702	274.093	102	1519		14	901.702	182.706	101	607
	15	901.702	287.547	101	1461		16	901.702	187.652	100	664
	17	901.702	296.001	102	1461		18	901.702	191.157	102	724
	19	901.702	303.272	100	1610		20	901.702	193.614	101	805
	21	901.702	306.39	103	1739		22	901.702	193.663	102	932
	23	901.702	303.986	103	1617		24	901.702	191.45	101	832
	25	901.702	304.222	103	1587		26	901.702	191.798	103	778
	27	901.702	313.717	100	1592		28	901.702	192.712	102	601
	29	901.702	311.398	101	1120		30	901.702	192.731	100	546
	31	901.702	288.077	102	1001		32	901.702	184.703	102	501
	33	901.702	243.75	101	733		34	901.702	168.122	102	406
	avg		274.711				avg		181.743
	unit area		0.304658				unit area		0.201556
238h 10d	green
	1	819.606	221.996	102	959		2	819.606	163.106	101	569
	3	819.606	230.462	103	1151		4	819.606	167.314	100	680
	5	819.606	242.592	101	1404		6	819.606	171.963	102	735
	7	819.606	257.798	101	1463		8	819.606	177.495	101	731
	9	819.606	271.6	102	1546		10	819.606	183.76	101	730
	11	819.606	284.307	101	1576		12	819.606	188.27	102	724
	13	819.606	291.74	103	1428		14	819.606	190.365	101	741
	15	819.606	294.735	102	1530		16	819.606	192.706	102	751
	17	819.606	297.608	101	1580		18	819.606	193.062	101	856
	19	819.606	299.476	102	1644		20	819.606	193.363	101	808
	21	819.606	304.213	101	1586		22	819.606	195.545	101	906
	23	819.606	313.047	101	1698		24	819.606	199.207	100	870
	25	819.606	326.83	102	1700		26	819.606	204.027	102	835
	27	819.606	332	103	1708		28	819.606	206.404	100	832
	29	819.606	313.512	102	1457		30	819.606	197.585	102	774
	31	819.606	271.189	102	1419		32	819.606	183.528	101	668
	33	819.606	229.126	102	888		34	819.606	166.689	101	556
	avg		281.308				avg		186.729
	unit area		0.343223				unit area		0.227827
263h 11d
	1	593.918	199.575	101	943		2	593.918	155.699	101	507
	3	593.918	206.148	101	1060		4	593.918	158.961	101	514
	5	593.918	212.053	101	1092		6	593.918	161.438	102	561
	7	593.918	217.811	102	1034		8	593.918	163.831	101	626
	9	593.918	222.28	101	1107		10	593.918	166.176	101	597
	11	593.918	227.443	101	1111		12	593.918	167.711	101	626
	13	593.918	231.533	103	1139		14	593.918	169.646	102	629
	15	593.918	234.184	102	1036		16	593.918	170.482	100	635
	17	593.918	235.261	102	1116		18	593.918	171.22	101	548
	19	593.918	234.023	101	993		20	593.918	170.119	100	549
	21	593.918	228.526	102	1202		22	593.918	167.947	101	707
	23	593.918	222.9	102	1212		24	593.918	164.273	101	680
	25	593.918	215.539	101	1239		26	593.918	161.313	101	778
	27	593.918	211.408	101	1450		28	593.918	159.088	102	772
	29	593.918	208.661	103	1307		30	593.918	157.562	100	765
	31	593.918	206.184	101	1189		32	593.918	156.216	102	661
	33	593.918	205.626	101	1132		34	593.918	155.63	102	596
	avg		218.774				avg		163.371
	unit area		0.368357				unit area		0.275074
287h 12d	green						red
	1	646.068	193.439	101	943		2	646.068	152.871	101	507
	3	646.068	199.316	101	1060		4	646.068	155.862	101	514
	5	646.068	204.768	101	1092		6	646.068	158.133	102	561
	7	646.068	210.014	101	1034		8	646.068	160.284	101	626
	9	646.068	214.109	101	1107		10	646.068	162.476	101	597
	11	646.068	218.829	101	1111		12	646.068	163.879	101	626
	13	646.068	222.597	103	1139		14	646.068	165.659	101	629
	15	646.068	224.962	101	1036		16	646.068	166.421	100	635
	17	646.068	226.006	102	1116		18	646.068	167.066	101	548
	19	646.068	224.84	100	993		20	646.068	166.042	100	549
	21	646.068	219.826	100	1202		22	646.068	164.067	101	707
	23	646.068	214.705	102	1212		24	646.068	160.675	101	680
	25	646.068	207.956	100	1239		26	646.068	157.972	101	778
	27	646.068	204.199	101	1450		28	646.068	155.978	102	772
	29	646.068	201.687	102	1307		30	646.068	154.583	102	765
	31	646.068	199.426	101	1189		32	646.068	153.36	102	661
	33	646.068	198.975	101	1132		34	646.068	152.831	102	596
	avg		210.921				avg		159.892
	unit area		0.326468				unit area		0.247484
315h 13d	green						red
	1	881.801	161.791	88	760		2	881.801	139.477	91	558
	3	881.801	162.839	86	692		4	881.801	140.187	91	510
	5	881.801	165.014	91	874		6	881.801	140.592	90	571
	7	881.801	167.668	91	828		8	881.801	142.892	92	581
	9	881.801	169.302	87	989		10	881.801	143.553	85	695
	11	881.801	173.916	90	1134		12	881.801	146.382	90	709
	13	881.801	180.448	92	1181		14	881.801	149.157	89	640
	15	881.801	186.869	88	1111		16	881.801	151.207	91	838
	17	881.801	192.606	90	1076		18	881.801	153.893	90	802
	19	881.801	197.844	90	1085		20	881.801	155.995	91	736
	21	881.801	200.854	90	1209		22	881.801	157.202	89	748
	23	881.801	203.798	87	1372		24	881.801	158.491	89	763
	25	881.801	205.146	89	1193		26	881.801	159.156	89	919
	27	881.801	207.13	91	1425		28	881.801	160.168	91	888
	29	881.801	209.31	90	1390		30	881.801	160.453	86	849
	31	881.801	211.763	88	1500		32	881.801	162.186	92	971
	33	881.801	217.688	88	1518		34	881.801	165.06	91	1001
	35	881.801	220.778	91	1516		36	881.801	165.585	89	939
	37	881.801	214.148	91	1461		38	881.801	163.272	88	851
	39	881.801	197.077	88	1234		40	881.801	157.675	90	775
	41	881.801	176.301	92	1007		42	881.801	146.73	89	679
			191.538						153.301
			0.217212						0.173849
334h 14d	green
	1	966.366	141.91	90	600		2	966.366	128.666	88	521
	3	966.366	145.517	91	638		4	966.366	131.193	91	690
	5	966.366	147.257	88	654		6	966.366	132.174	88	479
	7	966.366	147.575	90	692		8	966.366	132.372	90	510
	9	966.366	147.813	88	753		10	966.366	132.33	89	519
	11	966.366	148.422	87	754		12	966.366	132.512	88	480
	13	966.366	151.301	92	820		14	966.366	134.747	91	575
	15	966.366	153.854	90	874		16	966.366	135.686	90	526
	17	966.366	155.731	90	958		18	966.366	136.69	89	587
	19	966.366	158.311	91	887		20	966.366	137.926	90	724
	21	966.366	160.648	88	883		22	966.366	138.852	89	663
	23	966.366	162.618	88	1007		24	966.366	139.837	90	753
	25	966.366	166.839	92	1104		26	966.366	140.907	89	731
	27	966.366	167.198	90	992		28	966.366	141.409	90	652
	29	966.366	168.237	89	1241		30	966.366	141.574	90	630
	31	966.366	169.341	87	1062		32	966.366	142.155	92	632
	33	966.366	171.021	89	988		34	966.366	141.549	87	759
	35	966.366	174.198	89	1054		36	966.366	142.562	89	650
	37	966.366	177.27	91	965		38	966.366	144.433	88	552
	39	966.366	176.035	92	970		40	966.366	142.779	90	607
	avg		159.555				avg		137.518
	unit area		0.165108				unit area		0.142304
360h 15d	green						red
	1	864.226	139.155	89	482		2	864.226	129.106	90	411
	3	864.226	142.928	90	533		4	864.226	129.287	88	421
	5	864.226	145.417	88	534		6	864.226	130.367	91	429
	7	864.226	146.226	89	495		8	864.226	131.659	88	457
	9	864.226	147.539	91	570		10	864.226	132.387	88	419
	11	864.226	149.049	90	736		12	864.226	133.819	90	516
	13	864.226	150.257	91	797		14	864.226	134.054	90	565
	15	864.226	152.39	91	848		16	864.226	135.681	91	637
	17	864.226	154.714	89	813		18	864.226	136.274	86	619
	19	864.226	160.047	90	1026		20	864.226	139.045	92	688
	21	864.226	163.777	90	826		22	864.226	140.482	90	597
	23	864.226	168.237	91	854		24	864.226	142.756	90	643
	25	864.226	172.018	91	914		26	864.226	143.795	91	587
	27	864.226	175.487	90	967		28	864.226	145.093	91	682
	29	864.226	178.464	87	1010		30	864.226	145.377	87	737
	31	864.226	182.917	88	1385		32	864.226	148.404	89	792
	33	864.226	190.122	91	1283		34	864.226	150.862	91	918
	35	864.226	196.543	91	1336		36	864.226	154.142	90	873
	37	864.226	193.575	89	1385		38	864.226	153.097	91	756
	39	864.226	182.388	90	1062		40	864.226	147.659	91	625
	avg		164.562				avg		140.167
	unit area		0.190416				unit area		0.162188
