# Supplementary material for: Regeneration of the larval sea star nervous system by wounding induced respecification to the Sox2 lineage
Source: eLife. 2022 Jan 14;11:e72983. doi: 10.7554/eLife.72983 (PMC8809897; doi:10.7554/eLife.72983)
Supplement: Figure 4—source data 1. [file elife-72983-fig4-data1.xlsx]

## Sheet: Sheet1
			quantification sox4 green cells
	conv @4dpf, observe @7dpf					conv @2dpf, observe @5dpf					conv @bisection, observe @3dpb
		which larva	number of green cells			batch 5	which larva	number of green cells				which larva	number of green cells
	batch 8	larva b	1				larva 5	3			batch2	larva 1	2
		larva c	0				larva 7	3				larva 5	2
		larva 3	0				larva 4	1				larva 13	2
	batch 4	larva 4	0				larva 6	3			batch3	larva 10	2
	batch9	larva 1	0				larva 3	1	dying, not count			larva 17	2
		larva 2	1			batch 9	larva a	6				larva 3	5
		larva 4	0				larva i	4				larva 10	4
		larva 6	0				larva j	3
		larva 5	0				larva g	4
		avg	0.222222				avg	3.375				avg	2.71429
		stdev	0.440959				stdev	1.40789				stdev	1.25357
