# Supplementary material for: Regeneration of the larval sea star nervous system by wounding induced respecification to the Sox2 lineage
Source: eLife. 2022 Jan 14;11:e72983. doi: 10.7554/eLife.72983 (PMC8809897; doi:10.7554/eLife.72983)
Supplement: Figure 6—source data 1. [file elife-72983-fig6-data1.xlsx]

## Sheet: Fig. 6
	Sox2:Kaede cell specification in the cut site area by 3 dpb under Aphidicolin or vehicle treatment
															Percentage of Sox2:Kaede cell at wound site at 3dpb under Aphidicolin or DMSO
	batch I							batchI
		Red:Kaede	Yellow:Kaede	Green:Kaede	Total Number of cells	Number larvae analyzed			Red:Kaede	Yellow:Kaede	Green:Kaede	Total Number of cells	Number larvae analyzed		Aphidicolin		% Yellow, Kaede	% Green, Kaede
	Aphidicolin, 25 uM	3	9	0	12	4		0.08% DMSO	0	1	0	1	4			batchI	0.857143	0.00840336
		3	5	0	8				0	4	0	4				batchII	0.742268	0.0257732
		3	71	1	75				16	31	1	48				average	0.799705	0.0170883
		7	17	0	24				9	6	1	16
															DMSO	batchI	0.608696	0.0289855
	total number of cells	16	102	1	119			total number of cells	25	42	2	69				batchII	0.822314	0.0123967
	% of cells	0.134454	0.857143	0.00840336				% of cells	0.362319	0.608696	0.0289855					average	0.715505	0.0206911
	batchII							batchII
		Red:Kaede	Yellow:Kaede	Green:Kaede	Total Number of cells	Number larvae analyzed			Red:Kaede	Yellow:Kaede	Green:Kaede	Total Number of cells	Number larvae analyzed
	Aphidicolin, 25 uM	6	12	0	18	10		0.08% DMSO	15	29	1	45	11
		3	11	2	16				7	24	1	32
		0	11	1	12				5	54	0	59
		26	61	2	89				3	8	0	11
		1	9	0	10				1	4	0	5
		3	5	0	8				0	8	0	8
		3	11	0	14				0	33	0	33
		2	9	0	11				1	12	1	14
		0	6	0	6				2	9	0	11
		1	9	0	10				4	10	0	14
									2	8	0	10
	total number of cells	45	144	5	194
	% of cells	0.231959	0.742268	0.0257732				total number of cells	40	199	3	242
								% of cells	0.165289	0.822314	0.0123967
