# Supplementary material for: Regeneration of the larval sea star nervous system by wounding induced respecification to the Sox2 lineage
Source: eLife. 2022 Jan 14;11:e72983. doi: 10.7554/eLife.72983 (PMC8809897; doi:10.7554/eLife.72983)
Supplement: Supplementary file 1. [file elife-72983-supp1.xlsx]

## Sheet: Sheet1
Supplemental Table 1. List of primers used to prepare Whole mount insitu probes and accession number of gene model used
Gene	Accession number, GeneBank	Primers	Probe length, bp
elav	JX844801	Pm_Elav_1: 5’ CAACAACCCAAGTCAGAACT 3’	784
		Pm_Elav_2: 5’ CAAAATAATAACCGGGCTAA 3’
sox2	JX844802	Pm_sox2_1: 5’ gcgtgttgtctctgtgtgtt 3’	880
		Pm_sox2_2: 5’ gagatgatggagcagacgga 3’
sox4	JX844804	Pm_sox4_1: 5' CATCATCGGGCAGTGACTTG 3'	830
		Pm_sox4_2: 5' CAGGTCCGTGTGAGTACTGT 3'
six3	HQ148089	Pm_six3_1: 5’ tctcggcttcctggtagtgt 3’	248
		Pm_six3_2: 5’ gtgagacgttggaggagagc 3’
lhx2	HQ128716	Pm_lhx2_1: 5’ acgagagctaccggcaag 3’	241
		Pm_lhx2_2: 5’ atccagggtgactttgcact 3’
foxq2	HQ148091	Pm_foxq2_1: 5’ cctcctctgcgacatctacc 3’	271
		Pm_foxq2_2: 5’ acgggtggtacaccgaatag 3’
wnt3	echinobase.org	Pm_wnt3_1: 5' TGTGATACCAGACACCAAGG 3'	927
		Pm_wnt3_2: 5' GCCCAAATGTGCTTATTCAG 3'
