# Supplementary material for: Regeneration of the larval sea star nervous system by wounding induced respecification to the Sox2 lineage
Source: eLife. 2022 Jan 14;11:e72983. doi: 10.7554/eLife.72983 (PMC8809897; doi:10.7554/eLife.72983)
Supplement: Supplementary file 2. [file elife-72983-supp2.xlsx]

## Sheet: Sheet1
Supplemental Table 2: List of used antibodies.
Antibodies	Source	Host species	Dilution
Primary antibodies
Serotonin	Sigma (S5545)	rabbit	1:250
1E11	Nakajima et al., 2004	mouse	1:5
Secondary antibodies
Goat anti-mouse Cy3	Jackson Immunoresearch (115-165-146)	goat	1:2000
Goat anti-rabbit Cy3	Jackson Immunoresearch (115-165-144)	goat	1:2000
Goat anti-rabbit Alexa Fluor 488	Invitrogen (A11008)	goat	1:1000
