# Supplementary material for: Regeneration of the larval sea star nervous system by wounding induced respecification to the Sox2 lineage
Source: eLife. 2022 Jan 14;11:e72983. doi: 10.7554/eLife.72983 (PMC8809897; doi:10.7554/eLife.72983)
Supplement: Supplementary file 3. [file elife-72983-supp3.xlsx]

## Sheet: Sheet1
Supplemental Table 3: List of used BACs
Gene of interest	Fluorescent reporter	Source
Sox4	GFP	echinobase.org
	Kaede (Kaede-N1, Addgene #54726)
	mCardinal
Sox2	Kaede (Kaede-N1, Addgene # 54726)
